# Supplementary material for: Cytoplasmic levels of cFLIP determine a broad susceptibility of breast cancer stem/progenitor-like cells to TRAIL
Source: Springer Nature journal article supplement (doi:10.1186/s12943-015-0478-y), 2015-12-01

# Supplementary Figure 1

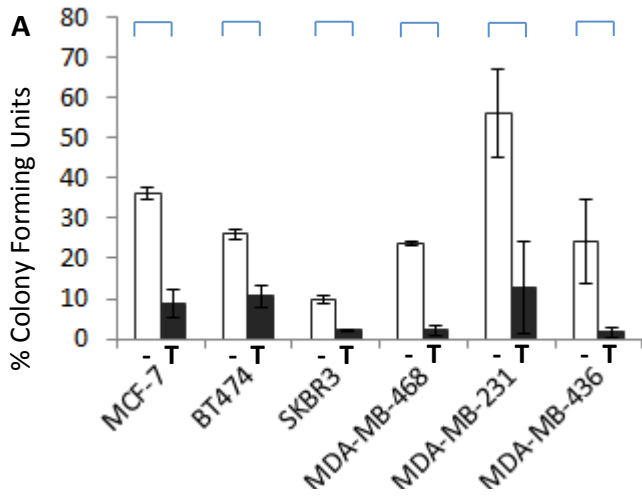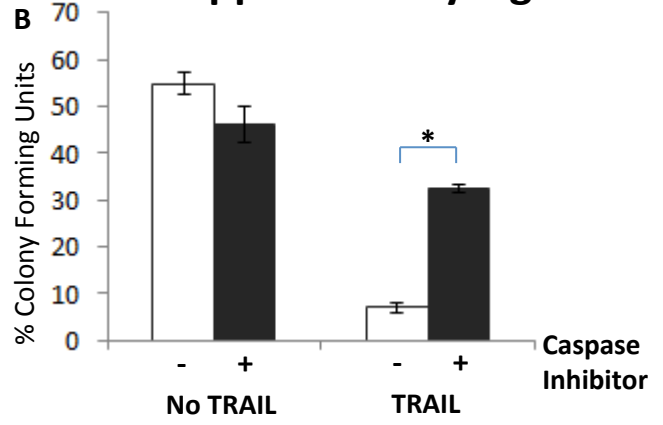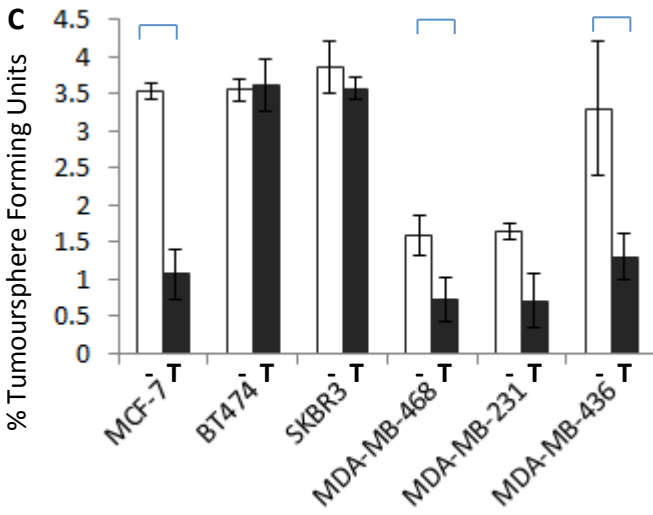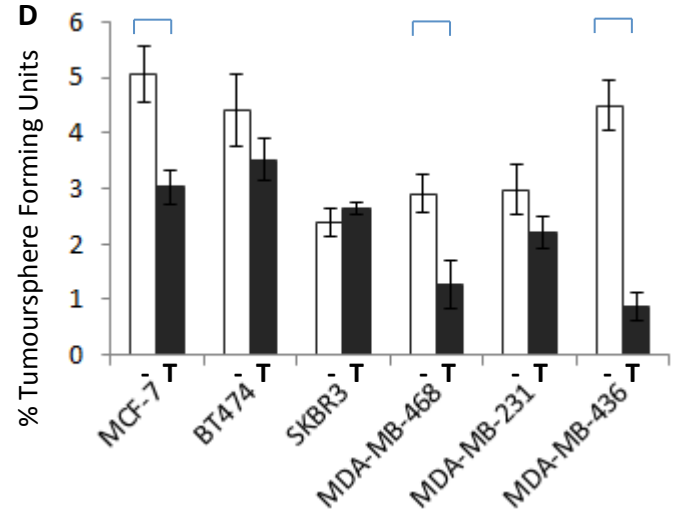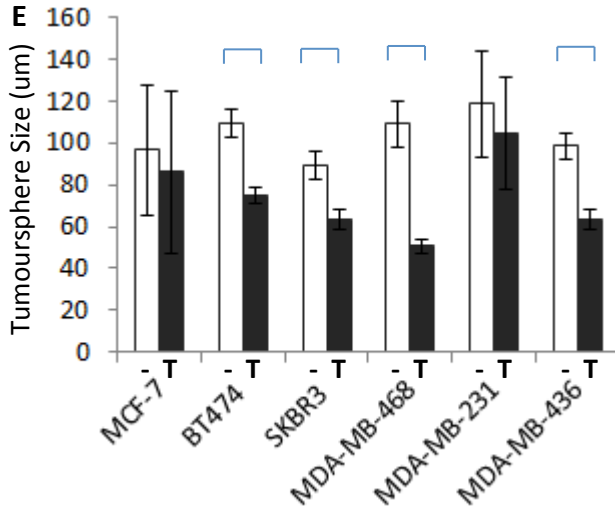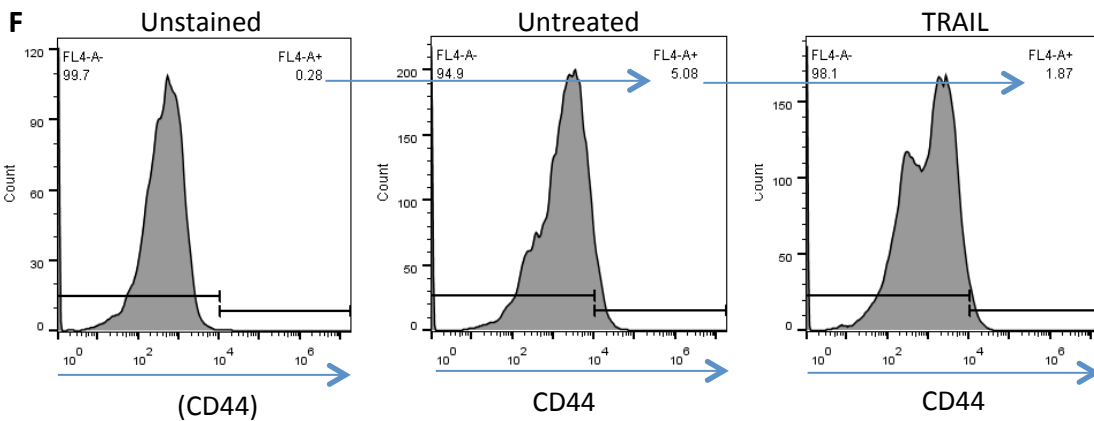

# Supplementary Figure 2

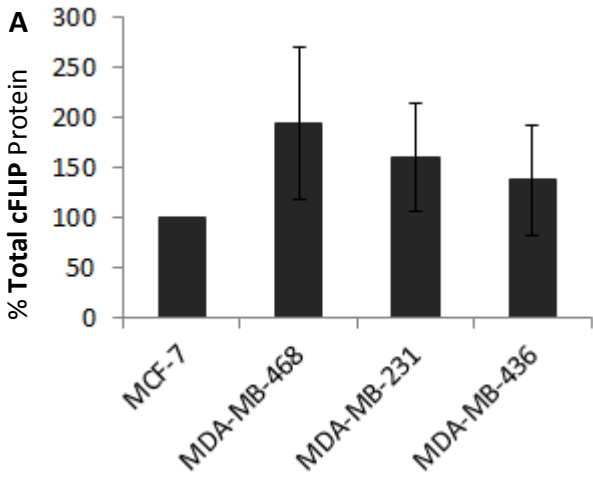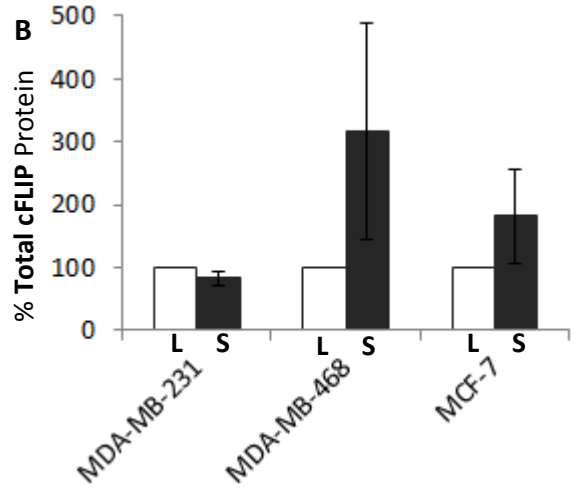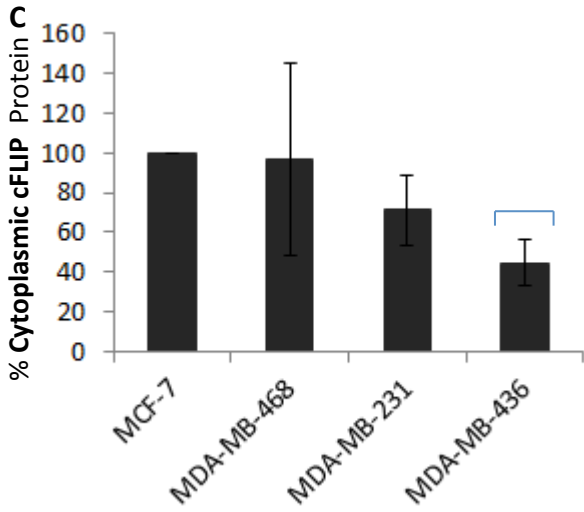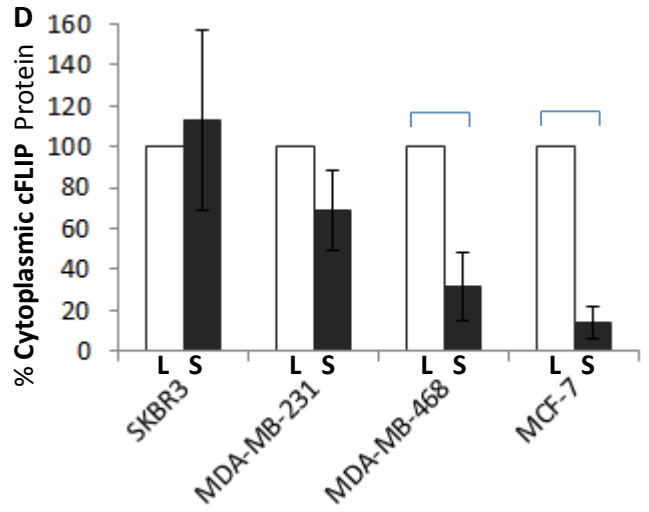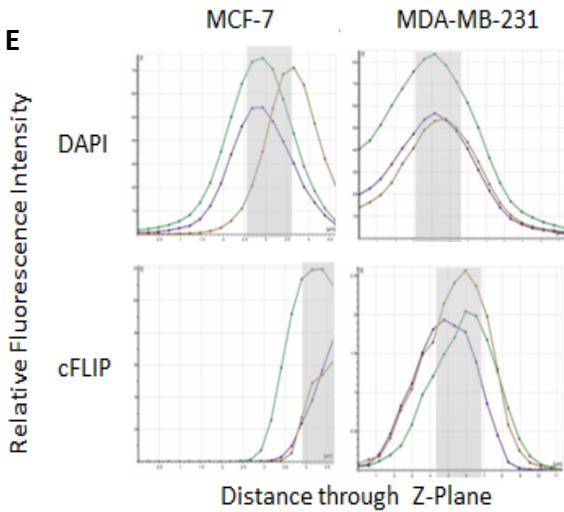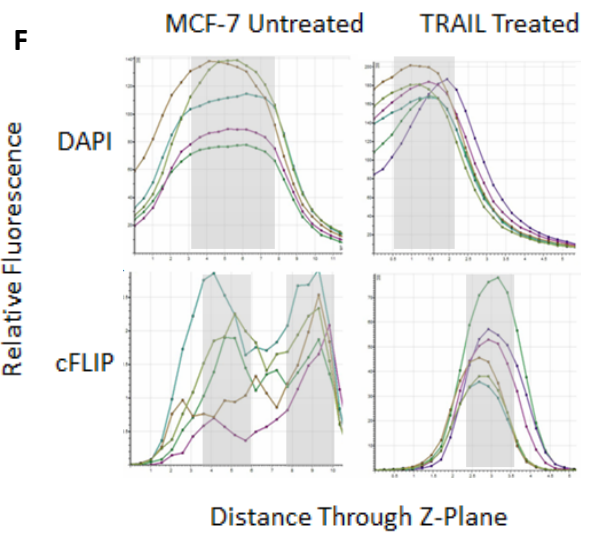

**G Total Protein**

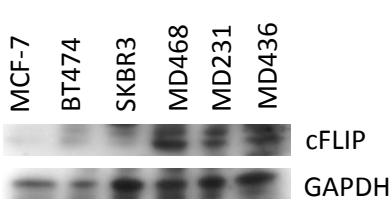

**H Cytoplasmic Protein**

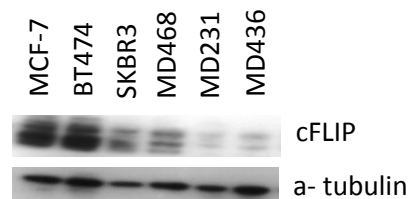

# Supplementary Figure 3

**A**

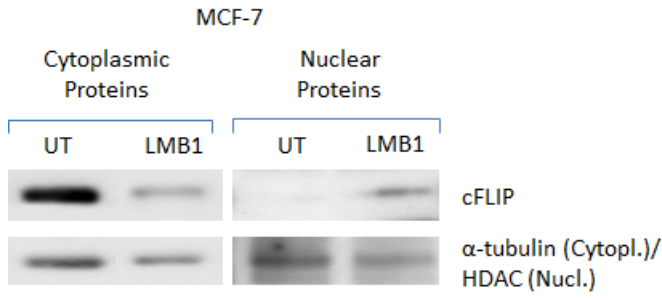

**B**

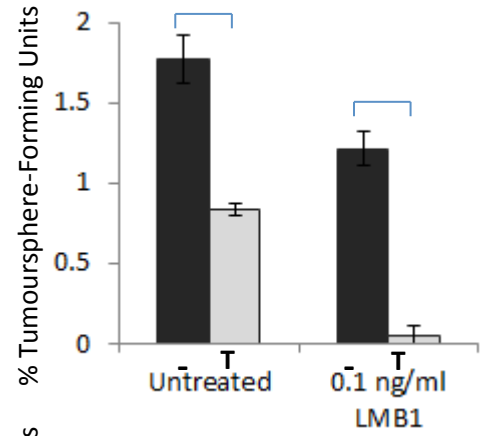

**C**

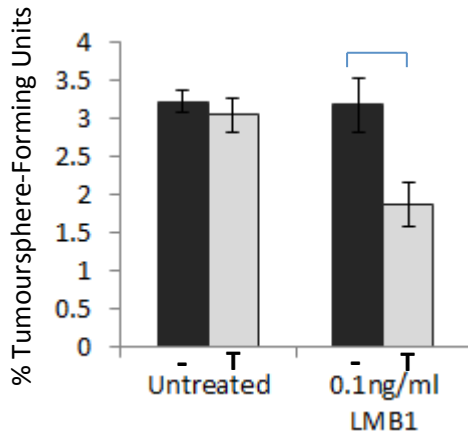

**D**

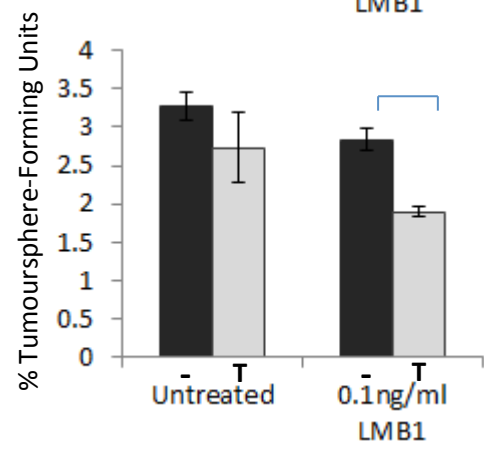

Supplement: MOESM1 [file 9763298]
